# Supplementary material for: Chemotherapy and EGFR tyrosine kinase inhibitors for treatment of brain metastases from non-small-cell lung cancer: survival analysis in 210 patients
Source: PubMed Central journal article supplement — Onco Targets Ther. 2013 Dec 4;6:1789–803. doi: 10.2147/OTT.S52172 (PMC3862699; doi:10.2147/ott.s52172), 2013-12-04
Supplement: ott-6-1789-supplement.pdf [file ott-6-1789-supplement.pdf]

### Supplementary table

**Table S1** The clinical characteristics of patients in different treatment groups

|                               | Localized treatment | Localized treatment + systemic medication | P-value | Localized treatment + TKIs | Localized treatment + chemotherapy | P-value | Localized treatment + pemetrexed | Localized treatment + other chemotherapy | P-value |
|-------------------------------|---------------------|-------------------------------------------|---------|----------------------------|------------------------------------|---------|----------------------------------|------------------------------------------|---------|
| Total                         | n=24                | n=186                                     |         | n=75                       | n=111                              |         | n=21                             | n=90                                     |         |
| Median age                    | 57.5                | 56                                        |         | 57                         | 57                                 |         | 60                               | 56                                       |         |
| Age, years                    |                     |                                           | 0.514   |                            |                                    | 0.720   |                                  |                                          | 0.279   |
| <65                           | 18                  | 154                                       |         | 63                         | 91                                 |         | 15                               | 76                                       |         |
| ≥65                           | 6                   | 32                                        |         | 12                         | 20                                 |         | 6                                | 14                                       |         |
| Sex                           |                     |                                           | 0.411   |                            |                                    | 0.026   |                                  |                                          | 0.469   |
| Male                          | 18                  | 124                                       |         | 43                         | 81                                 |         | 14                               | 67                                       |         |
| Female                        | 6                   | 62                                        |         | 32                         | 30                                 |         | 7                                | 23                                       |         |
| Smoking status                |                     |                                           | 0.230   |                            |                                    | 0.003   |                                  |                                          | 0.123   |
| Never                         | 7                   | 78                                        |         | 41                         | 37                                 |         | 10                               | 27                                       |         |
| Former or current             | 17                  | 108                                       |         | 34                         | 74                                 |         | 11                               | 63                                       |         |
| KPS                           |                     |                                           | 0.227   |                            |                                    | 0.298   |                                  |                                          | 0.538   |
| ≥70                           | 14                  | 131                                       |         | 56                         | 75                                 |         | 13                               | 62                                       |         |
| <70                           | 10                  | 55                                        |         | 19                         | 36                                 |         | 8                                | 28                                       |         |
| Histology                     |                     |                                           | 0.035   |                            |                                    | 0.113   |                                  |                                          | 0.029   |
| Adenocarcinoma                | 12                  | 125                                       |         | 55                         | 70                                 |         | 20                               | 50                                       |         |
| Squamous carcinoma            | 7                   | 32                                        |         | 8                          | 24                                 |         | 0                                | 24                                       |         |
| Others                        | 5                   | 29                                        |         | 12                         | 17                                 |         | 1                                | 16                                       |         |
| Number of brain metastases    |                     |                                           | 0.791   |                            |                                    | 0.637   |                                  |                                          | 0.656   |
| 1                             | 10                  | 53                                        |         | 16                         | 37                                 |         | 6                                | 31                                       |         |
| 2-3                           | 4                   | 70                                        |         | 36                         | 34                                 |         | 7                                | 27                                       |         |
| >3                            | 10                  | 63                                        |         | 23                         | 40                                 |         | 8                                | 32                                       |         |
| Extracranial metastases       |                     |                                           | 0.153   |                            |                                    | 0.407   |                                  |                                          | 0.438   |
| No                            | 12                  | 69                                        |         | 26                         | 43                                 |         | 7                                | 36                                       |         |
| Vesical organ                 | 8                   | 65                                        |         | 25                         | 40                                 |         | 7                                | 33                                       |         |
| Others                        | 4                   | 52                                        |         | 24                         | 28                                 |         | 7                                | 21                                       |         |
| Brain metastases distribution |                     |                                           | 0.047   |                            |                                    | 0.065   |                                  |                                          | 0.068   |
| Synchronous                   | 8                   | 102                                       |         | 35                         | 67                                 |         | 9                                | 58                                       |         |
| Heterochronous                | 16                  | 84                                        |         | 40                         | 44                                 |         | 12                               | 32                                       |         |
| Local treatments              |                     |                                           | 0.779   |                            |                                    | 0.006   |                                  |                                          | 0.929   |
| WBRT                          | 20                  | 159                                       |         | 71                         | 88                                 |         | 17                               | 71                                       |         |
| WBRT + surgery/SRS            | 4                   | 27                                        |         | 4                          | 23                                 |         | 4                                | 19                                       |         |
| RTOG RPA class                |                     |                                           | 0.085   |                            |                                    | 0.983   |                                  |                                          | 0.962   |
| Class I                       | 6                   | 41                                        |         | 14                         | 27                                 |         | 4                                | 23                                       |         |
| Class II                      | 9                   | 89                                        |         | 42                         | 48                                 |         | 9                                | 39                                       |         |
| Class III                     | 9                   | 56                                        |         | 19                         | 36                                 |         | 8                                | 28                                       |         |

(Continued)

**Table S1** (Continued)

|                | Localized treatment | Localized treatment + systemic medication | P-value | Localized treatment + TKIs | Localized treatment + chemotherapy | P-value | Localized treatment + pemetrexed | Localized treatment + other chemotherapy | P-value |
|----------------|---------------------|-------------------------------------------|---------|----------------------------|------------------------------------|---------|----------------------------------|------------------------------------------|---------|
| RTOG GPA grade |                     |                                           | 0.494   |                            |                                    | 0.249   |                                  |                                          | 0.443   |
| 0-1            | 8                   | 36                                        |         | 11                         | 25                                 |         | 4                                | 21                                       |         |
| 1.5-2.5        | 11                  | 121                                       |         | 54                         | 67                                 |         | 14                               | 53                                       |         |
| 3              | 3                   | 19                                        |         | 7                          | 12                                 |         | 2                                | 10                                       |         |
| 3.5-4          | 2                   | 10                                        |         | 3                          | 7                                  |         | 1                                | 6                                        |         |

**Abbreviations:** GPA, graded prognostic assessment; KPS, Karnofsky Performance Scale; SRS, stereotactic radiosurgery; WBR T, whole brain radiation therapy; RPA, recursive partitioning analysis; RTOG, Radiation Therapy Oncology Group; TKIs, tyrosine kinase inhibitors.

**OncoTargets and Therapy**

Dovepress

**Publish your work in this journal**

OncoTargets and Therapy is an international, peer-reviewed, open access journal focusing on the pathological basis of all cancers, potential targets for therapy and treatment protocols employed to improve the management of cancer patients. The journal also focuses on the impact of management programs and new therapeutic agents and protocols on

patient perspectives such as quality of life, adherence and satisfaction. The manuscript management system is completely online and includes a very quick and fair peer-review system, which is all easy to use. Visit <http://www.dovepress.com/testimonials.php> to read real quotes from published authors.

Submit your manuscript here: <http://www.dovepress.com/oncotargets-and-therapy-journal>
